## Correction: PDGFR $\alpha$ depletion attenuates glioblastoma stem cells features by modulation of STAT3, RB1 and multiple oncogenic signals

**Carlo Cenciarelli, Hany E. Marei, Armando Felsani, Patrizia Casalbore, Gigliola Sica, Maria Ausiliatrice Puglisi, Angus J.M. Cameron, Alessandro Olivi and Annunziato Mangiola**

Copyright: Cenciarelli et al. This is an open-access article distributed under the terms of the Creative Commons Attribution License (CC-BY), which permits unrestricted use, distribution, and reproduction in any medium, provided the original author and source are credited.

**Present:** Reference and callout information were presented incorrectly for reference 24.

**Correct:** The proper reference and callout information are listed below.

### RESULTS

Cancer stem cells from GBM were isolated as described previously [24]. We were able to collect either core- (c-CSC) or peritumor tissue-derived cancer stem cells (p-CSC) from several primary GBM samples. The two types of CSC form intracranial tumors in immunocompromised mice. Nevertheless, c-CSC showed a higher tumor initiating ability when compared with p-CSC which had a lower tumorigenicity [24].

### REFERENCES

24. Lama G, Mangiola A, Proietti G, Colabianchi A, Angelucci C, D'Alessio A, De Bonis P, Geloso MC, Lauriola L, Binda E, Biamonte F, Giuffrida MG, Vescovi A, Sica G. Progenitor/Stem Cell Markers in Brain Adjacent to Glioblastoma: GD3 Ganglioside and NG2 Proteoglycan Expression. *J Neuropathol Exp Neurol*. 2016; 75:134-47.

Original article: *Oncotarget*. 2016; 7:53047-53063. doi: 10.18632/oncotarget.10132
